# Supplementary material for: Pseudogenes of annexin A2, novel prognosis biomarkers for diffuse gliomas
Source: PubMed Central journal article supplement (PMC5739788; doi:10.18632/oncotarget.22197), 2017-10-31
Supplement: oncotarget-08-106962-s001.pdf [file oncotarget-08-106962-s001.pdf]

# Pseudogenes of annexin A2, novel prognosis biomarkers for diffuse gliomas

## SUPPLEMENTARY MATERIALS

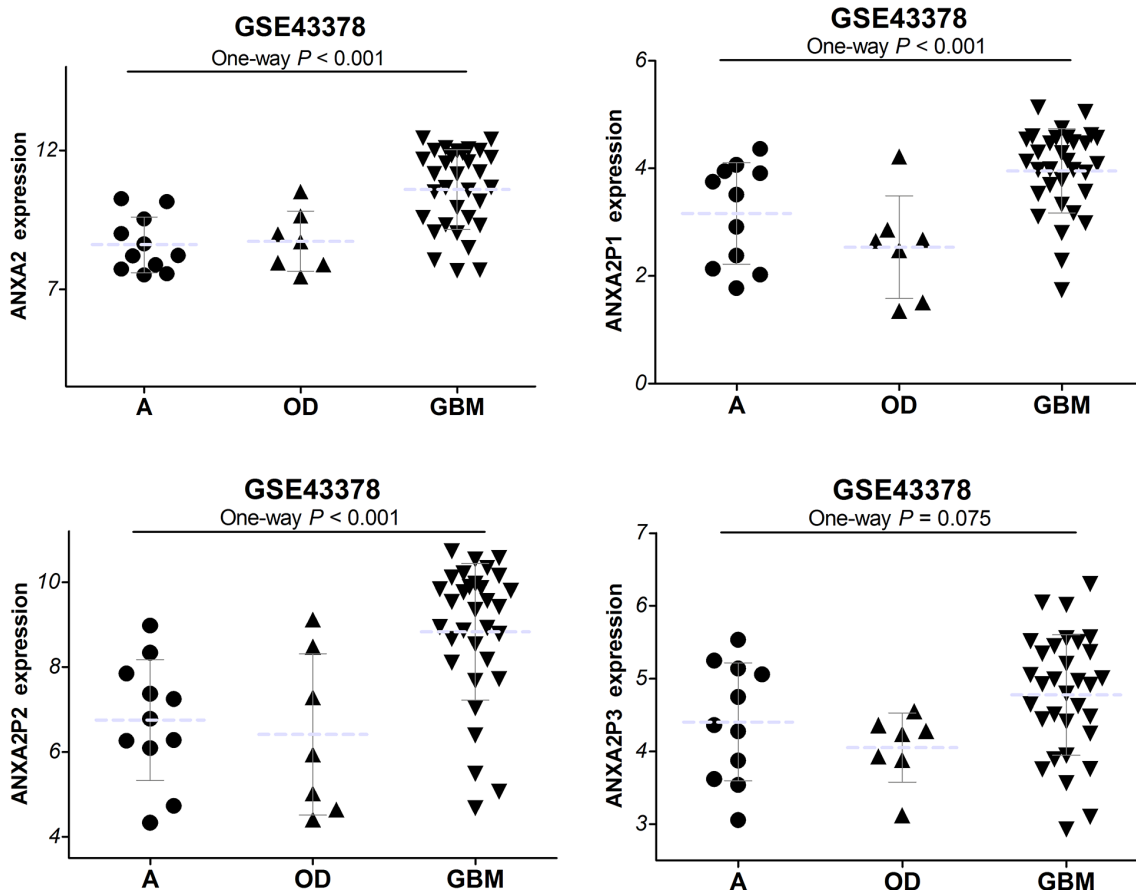

**Supplementary Figure 1:** ANXA2 and annexin A2 pseudogenes expression in glioma samples of the GSE43378 dataset. Total 50 cases of glioma samples (11 cases of A, 7 cases of OD, 32 cases of GBM).

**Supplementary Table 2: Clinical and molecular pathology characteristics of diffuse glioma patients**

| Clinical characteristics   | Specimens   |
|----------------------------|-------------|
| Number of patients (n)     | 99          |
| Oligodendroglioma          | 13          |
| Oligoastrocytoma           | 10          |
| Astrocytoma                | 50          |
| Glioblastoma with grade IV | 26          |
| Gender, female / male      | 37 / 62     |
| Age at diagnosis, year     | 45.34±1.543 |
| KPS score, >80 / ≤80       | 83 / 16     |

Abbreviations: KPS, karnofsky performance score; +: positive, -: negative.

**Supplementary Table 1: Probe sets represent on Affymetrix HG-U133 Plus 2.0 arrays.**

**See Supplementary File 1**
